# Supplementary material for: Photografted temperature-sensitive poly(N-isopropylacrylamide) thin film with a superfast response rate and an interesting transparent–opaque–transparent change in its deswelling process
Source: Royal Society of Chemistry journal article supplement (doi:10.1039/c2sm07404d), 2012-01-01
Supplement: c2sm07404d.pdf [file c2sm07404d.pdf]

## Supporting Information

### **Photografted temperature-sensitive poly(*N*-isopropylacrylamide) thin film with a superfast response rate and an interesting transparent-opaque-transparent change in its deswelling process**

Wenwen Xu, Xiunan Yin, Gen He, Jing Zhao, Huiliang Wang\*

[\*] Prof. H. L. Wang

College of Chemistry, Beijing Normal University,

Beijing 100875, China

E-mail: [wanghl@bnu.edu.cn](mailto:wanghl@bnu.edu.cn)

## Experimental part

### UV equipment

The UV system with a shutter assembly and an air cooling fan was supplied by RunWing Co., Ltd. (Shenzhen, China). The input power of the high-pressure mercury UV lamp was 2 kW. Quartz glass was used to isolate UV light. The UVC ( $254 \pm 10$  nm) intensity on sample surfaces was  $7.3 \text{ mW/cm}^2$ .

### Grafting procedure

Photografting was carried out in an 8-cm-diameter Petri dish containing 10.0 mL solution and one PE film floating on the top surface of solution with only one side contacting the solution. The Petri dish was covered with polyethylene foil to prevent the evaporation of the solution. Then the PE film was irradiated with UV light for a desired period. The grafted films were firstly washed with deionized water at ambient temperature for several times, and then subjected to soxhlet extraction with acetone to remove residual monomer and homopolymer. Then the samples were vacuum dried at  $40 \text{ }^\circ\text{C}$  for another 24 h.

The extent of grafting ( $G$ ), in  $\mu\text{g/cm}^2$ , was expressed as the mass increase per surface area of the sample, and was calculated from Equation (1):

$$G = \frac{m_g - m_0}{S} (\mu\text{g} / \text{cm}^2) \quad (1)$$

where  $m_g$  and  $m_0$  are the masses of the PE sample after and before grafting;  $S$  is the surface area of PE sample ( $25 \text{ cm}^2$ ). The mass was determined using an electronic balance (0.1 mg). Typical relative errors in  $G$  of three samples were  $\pm 5\%$ .

### ATR-FTIR characterization

Attenuated total reflectance-Fourier transform infrared (ATR-FTIR) spectra were obtained from pristine and grafted thin film samples on an Avatar-380 spectrometer (Nicolet Analytical Instruments, Madison, WI) equipped with a Smart Orbit assessor (Thermo Electron Corporation, Waltham, MA). The number of scans was 32 at a resolution of  $4 \text{ cm}^{-1}$ . Carbonyl index (CI) was used to study the grafting semi-quantitatively and it was calculated by Equation (1):

$$CI = \frac{A_{C=O}}{A_{C-H}} \quad (1)$$

where  $A_{C=O}$  is the absorbance of carbonyl  $A_{C=O}$  stretching vibration peak at about  $1629\text{ cm}^{-1}$ , which is the characteristic peak of carbonyl group in PNIPAAm, and  $A_{C-H}$  is the absorbance of  $\text{CH}_2$  scissors vibration at  $1460\text{ cm}^{-1}$ , which had no significant change during grafting process and was used as an internal reference to facilitate semi-quantitative analysis. These peaks were auto-baselined before calculating the absorbance. The automatic baseline correction and the calculation of absorbance were treated with the EZ OMNIC 5.2 software accompanying the instrument.

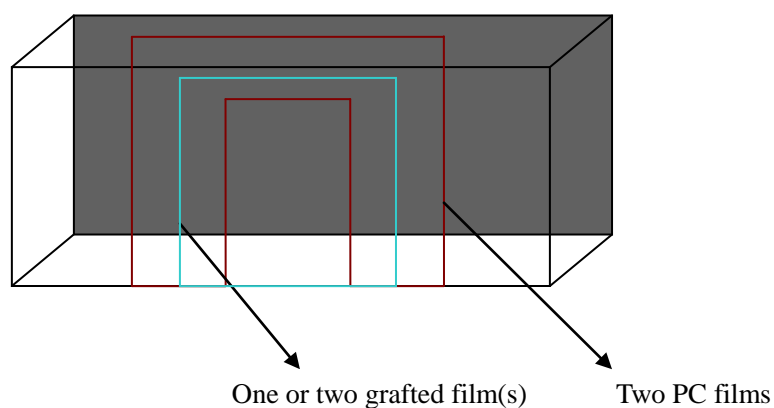

**Fig. S1.** Schematic apparatus for measuring the grey scale change during deswelling.

## Results and Discussion

### ATR-FTIR characterization

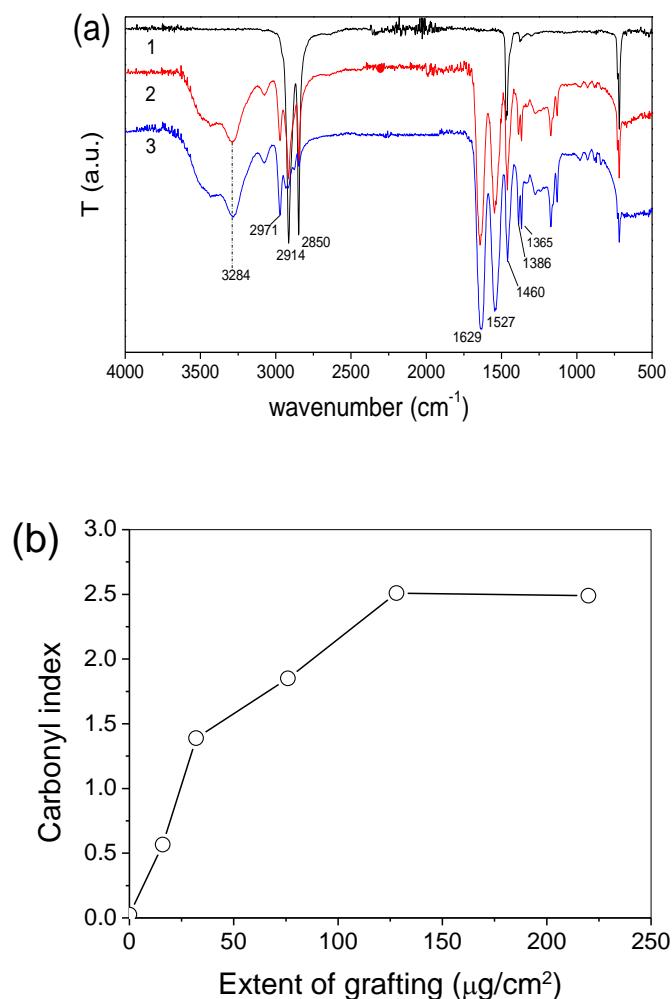

**Fig. S2** ATR-FTIR characterizations. (a): ATR-FTIR spectra of pristine PE film (1) and the PE films photographed for 4 min (2) and 8 min (3); (b) Carbonyl index (CI) of PE films with different EOG. Grafting reactions were performed in 1.5 mol/L NIPAAm solution.

ATR-FTIR spectroscopy is a surface-sensitive technique that provides molecular-scale information on surfaces. The pristine PE film and the grafted films were characterized with ATR-FTIR (Fig. 2a). Compared with the spectrum of pristine PE film which has only simple absorption bands attributed to the vibration of C-C and C-H bonds, the spectra of the grafted films show the characteristic absorption peaks of PNIPAAm,<sup>1,2</sup> *i.e.* an wide strong absorption band in the 3100-3700 cm<sup>-1</sup> region with the peak at 3284 cm<sup>-1</sup> due to N-H stretching vibration,

an absorption peak located at  $2971\text{ cm}^{-1}$  due to the stretching vibration of C-H in  $\text{CH}_3$  group, a strong but shifted C=O band at  $1629\text{ cm}^{-1}$  due to the stretching vibration of the C=O group which is inter and intra-molecular hydrogen bonded,<sup>3</sup> a absorption peak at  $1527\text{ cm}^{-1}$  due to N-H in-plane bending vibration and C-N stretching vibration, a peak at  $1460\text{ cm}^{-1}$  attributed to  $\text{CH}_2$  scissors vibration and  $\text{CH}_3$  antisymmetric deformation, and the doublet absorption peak at  $1386\text{ cm}^{-1}$  and  $1365\text{ cm}^{-1}$  corresponds to the symmetrical bending vibration of isopropyl  $-\text{CH}(\text{CH}_3)_2$  group. The ATR-FTIR characterization proves that PNIPAAm chains have been successfully grafted onto the surface of PE film.

The calculated CIs of the grafted samples are shown in Fig. 2b. The CI of the grafted samples increased very quickly with the increase of EOG till about  $120\text{ }\mu\text{g}/\text{cm}^2$ , and then kept almost constant. The leveling of CI with the EOG appears at a much lower EOG than that found with transmission FTIR,<sup>4</sup> since the large number of total internal reflections makes ATR-FTIR at least two orders of magnitude more sensitive than transmission infrared spectroscopy.<sup>5</sup> The leveling off in CI may indicate that the surface of PE film has been fully covered with PNIPAAm chains.

## References

1. A. Q. Song, D. Zhao, R. Rong, L. Zhang and H. L. Wang, *J. Appl. Polym. Sci.*, 2011, **119**, 629-635.
2. J. Nie, J. Han, K. M. Wang and D. Z. Yang, *Int. J. Biol. Macromol.*, 2009, **44**, 229-235.
3. B. K. Chen, S. H. Lo and S. F. Lee, *Chinese J. Polym. Sci.*, 2010, **28**, 607-613.
4. J. M. Han and H. L. Wang, *J. Appl. Polym. Sci.*, 2009, **113**, 2062-2071.
5. S.-Y. Lin, K.-S. Chen and L. Run-Chu, *Polymer*, 1999, **40**, 6307-6312.

**Table S1.** Elemental composition of the grafted surfaces.

| EOG<br>( $\mu\text{g}/\text{cm}^2$ ) | Elements % of thin films |                   |                   |                   |       |       |      |
|--------------------------------------|--------------------------|-------------------|-------------------|-------------------|-------|-------|------|
|                                      | C                        | C <sub>1s,a</sub> | C <sub>1s,b</sub> | C <sub>1s,c</sub> | N     | O     | C/N  |
| 17                                   | 76.69                    | 47.94             | 16.25             | 12.50             | 12.03 | 11.28 | 6.37 |
| 110                                  | 76.59                    | 48.48             | 15.70             | 12.41             | 12.14 | 11.27 | 6.31 |

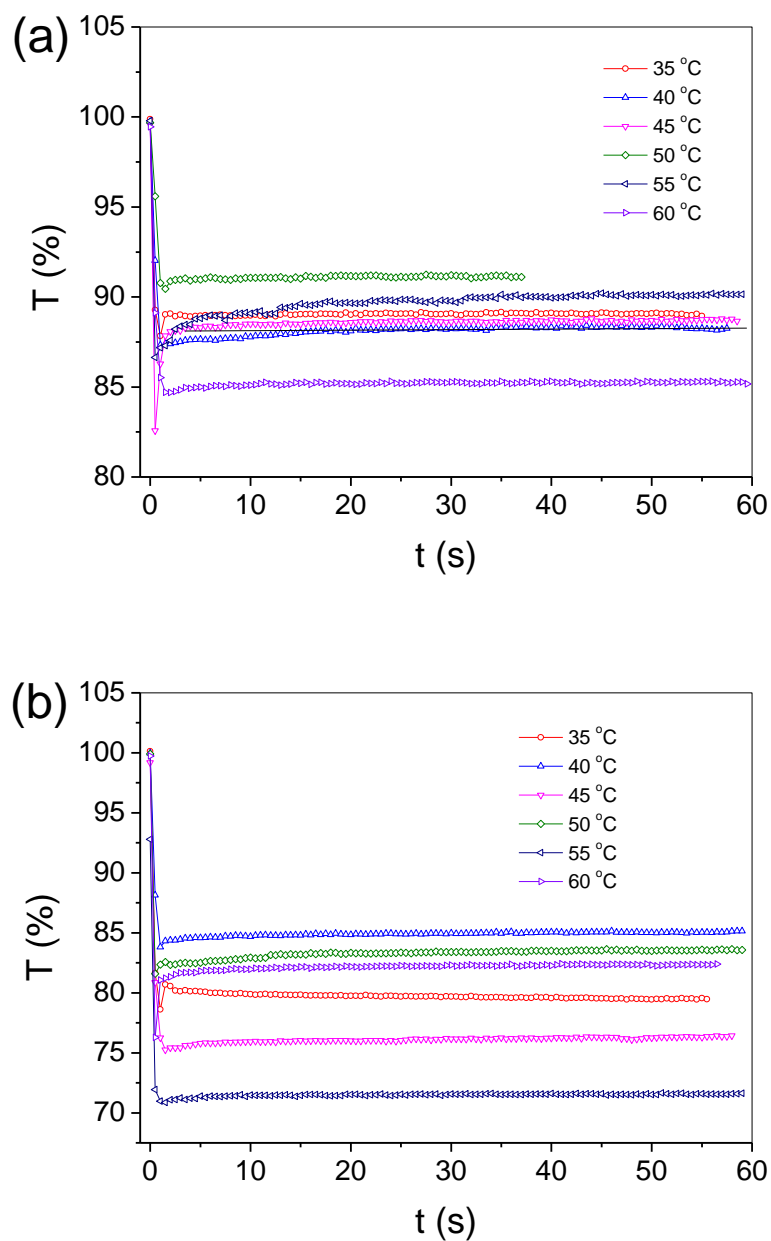

**Fig. S3.** Transparency change in the deswelling process of PNIPAAm layer photografted in 2 mol/L NIPAAm solution for 6 min (a) and 8 min (b).

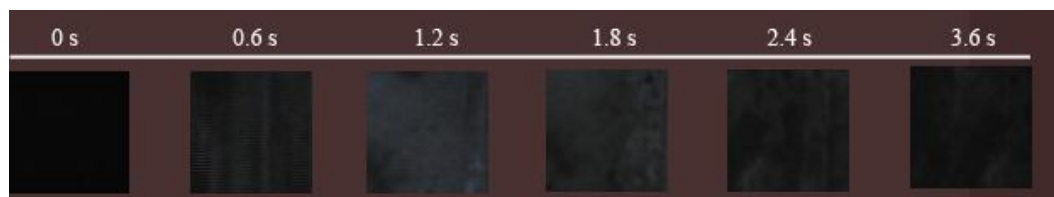

**Fig. S4.** Photos showing the transparency change in the deswelling process of grafted PNIPAAm at 50 °C. The sample used was photografted in 2 mol/L NIPAAm solution for 10 min.
